# Supplementary material for: A novel dual-model photoelectrochemical/electrochemical sensor based on Z-scheme TiO2 disks/methylene blue for kanamycin detection
Source: Royal Society of Chemistry journal article supplement (doi:10.1039/d4ay01023j), 2024-01-01
Supplement: d4ay01023j1.pdf [file d4ay01023j1.pdf]

## Supplementary Information

### **A novel dual-model photoelectrochemical/electrochemical sensor for kanamycin detection based on Z-scheme TiO<sub>2</sub> disk/methylene blue**

Wenchao Geng<sup>a</sup>, Huimin Liu<sup>b</sup>, Zhiyi Yan<sup>b</sup>, Jiangying Ji<sup>b</sup>, Fei Wang<sup>a,\*</sup>, Ruiying Yang<sup>b,\*</sup>

*a School of Chemical and Printing Dyeing Engineering, Henan University of Engineering, Zhengzhou, 451191, China*

*b College of Public Health, Zhengzhou University, Zhengzhou 450001, China*

### **List of Contents**

1. Reagents and apparatus
2. Photocurrent responses
3. Reproducibility of the sensor
4. Comparison of various methods for Kana detection

## 1. Reagents and apparatus

ITO electrode was purchased from Zhuhai Kaivo Electronic Components Co., Ltd (China). Methyl alcohol, p-Phthalic acid, titanium tetraisopropanolate and methylene blue (MB) were provided from Shanghai Aladdin Industrial Co. Ltd, China. Bovine serum albumin (BSA) was obtained from Sigma Aldrich (USA). Ascorbic acid (AA), anhydrous methanol (MeOH) and N, N-dimethylformamide (DMF) were all offered by Sinopharm Chemical Reagent Co. Ltd. (China). Other chemicals were of analytical grade and used as received. All aqueous solutions were prepared with ultrapure water from a Milli-Q filtration system (Millipore Corp, USA). DNA oligonucleotides were acquired from Sangon Biotechnology Co., Ltd. and the sequences were listed in Table S1, and the Kana-aptamer sequence referred to the published literature<sup>1</sup>.

**Table S1.** Oligonucleotide sequences used in experiments.

| Oligos | 5'-Sequences-3'                                                               |
|--------|-------------------------------------------------------------------------------|
| Apt    | NH <sub>2</sub> -(CH <sub>2</sub> ) <sub>6</sub> -TGG GGG TTG AGG CTA AGC CGA |
| cDNA   | TCG GCT TAG CCT CAA CCC CCA                                                   |

Transmission electron microscopy (TEM) image was characterized by JEM-2100F microscope (JEM-2100F, Japan). X-ray diffraction (XRD) experiment was carried out on an X-ray diffractometer (D/MAX-RA, Japan). The UV-vis spectrum was obtained using a DS5 UV-vis spectrophotometer (DS5, England). A Xe lamp (PLSSXE300) fitted with a 420 nm filter was used as light source. PEC and electrochemical impedance spectroscopic (EIS) measurements were accomplished by a CHI 660E electrochemical workstation with an ITO electrode (diameter, 5.6 mm) as the working electrode, a saturated calomel electrode (SCE) as the reference electrode, and a platinum wire as the counter electrode. A xenon lamp with a wavelength greater

than 420 nm was used as the excitation light source. EIS measurements were performed in 0.1 M KCl + 5 mM (1:1)  $[\text{Fe}(\text{CN})_6]^{3-/4-}$  solution in the frequency range from 0.1 Hz to 100 kHz with 5 mV as the amplitude.

## 2. Photocurrent responses

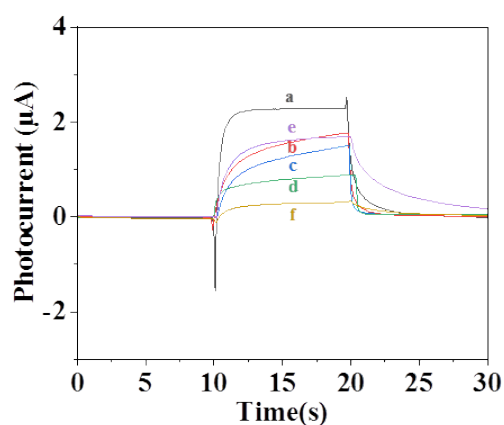

**Fig. S1.** PEC investigation: (a)  $\text{TiO}_2/\text{ITO}$ ; (b)  $\text{CS}/\text{TiO}_2/\text{ITO}$ ; (c)  $\text{dsDNA}/\text{CS}/\text{TiO}_2/\text{ITO}$ ; (d)  $\text{BSA}/\text{dsDNA}/\text{CS}/\text{TiO}_2/\text{ITO}$ ; (e)  $\text{MB}/\text{BSA}/\text{dsDNA}/\text{CS}/\text{TiO}_2/\text{ITO}$ ; (f)  $\text{Kana}/\text{MB}/\text{BSA}/\text{dsDNA}/\text{CS}/\text{TiO}_2/\text{ITO}$ .

## 3. Reproducibility of the sensor

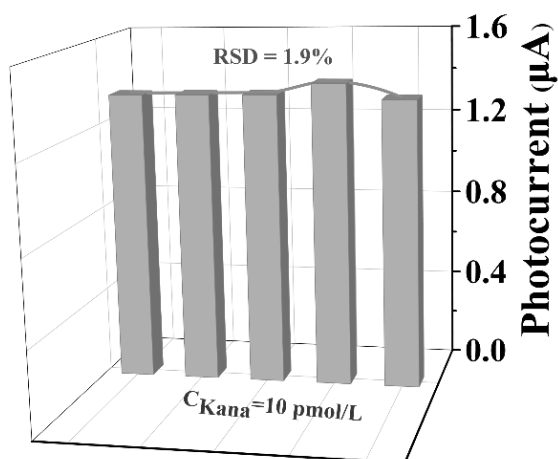

**Fig. S2.** Reproducibility of the sensor

#### 4. Comparison of various methods for Kana detection

**Table S2.** Comparison of various methods for Kana detection.

| Method     | System                                                          | LOD            | References       |
|------------|-----------------------------------------------------------------|----------------|------------------|
| FL         | CDs@Chol                                                        | 7.2 $\mu$ M    | [2]              |
| PEC/EC     | Z-scheme AgBr/AgI-Ag-CNTs                                       | 0.4 pM/5 pM    | [3]              |
| FL         | AuNCs-MnO <sub>2</sub>                                          | 1.2 pM         | [4]              |
| ECL        | 6,6'-(1,4-phenylene)bis(1,3,5-triazine-2,4-diamine)             | 0.28 nM        | [5]              |
| MCE        | AuMPs and PCR                                                   | 2.5 pM         | [6]              |
| PEC        | rGO-Bi <sub>2</sub> WO <sub>6</sub> -Au                         | 0.78 pM        | [7]              |
| EC         | VS <sub>2</sub> /AuNPs                                          | 0.5 pM         | [8]              |
| FL         | CuWO <sub>4</sub> nanomaterials                                 | 3.5 pM         | [9]              |
| SERS       | MIL-101@AuNP nanohybrids                                        | 1 pg/mL        | [10]             |
| ECL        | Ru@MOF                                                          | 13.7 pM        | [11]             |
| EC         | Ti <sub>3</sub> C <sub>2</sub> TX/MoS <sub>2</sub> /MWCNT@rGONR | 135 pM         | [12]             |
| PEC        | Z-scheme Zn-defective CdS/ZnS                                   | 1.86 pg/mL     | [13]             |
| <b>PEC</b> | <b>Z-scheme TiO<sub>2</sub>/MB</b>                              | <b>0.17 pM</b> | <b>This work</b> |
| <b>EC</b>  |                                                                 | <b>1.8 pM</b>  |                  |

MCE: microchip electrophoresis. ECL: Electrochemiluminescence. FL: fluorescence.

EC: electrochemical. PEC: photoelectrochemical. SERS: surface-enhanced Raman spectroscopy.

## 5. References

- [1] R.J. Zeng, Z.B. Luo, L.S. Su, L.J. Zhang, D.P. Tang, R. Niessner, D. Knopp, Palindromic molecular beacon based Z-scheme BiOCl-Au-CdS photoelectrochemical biodetection. *Anal. Chem.* 91 (2019) 2447–2454.
- [2] L. Zhao, J. Liu, Y. Bai, F. Feng, X. Yang, Yellow-emission and pH-responsive carbon dots employed for “turn-off” and “turn-off-on” assaying adenosine triphosphate and kanamycin, *Colloids and Surfaces A: Physicochemical and Engineering Aspects*. 630 (2021) 127640.
- [3] Z. Liu, K. Deng, H. Zhang, C. Li, J. Wang, H. Huang, Q. Yi, H. Zhou, Dual-mode photoelectrochemical/electrochemical sensor based on Z-scheme AgBr/AgI-Ag-CNTs and aptamer structure switch for the determination of kanamycin, *Microchim Acta*. 189 (2022) 417.
- [4] R. Zeng, Y. Tang, L. Zhang, Z. Luo, D. Tang, Dual-readout aptasensing of antibiotic residues based on gold nanocluster-functionalized MnO<sub>2</sub> nanosheets with target-induced etching reaction, *J. Mater. Chem. B*. 6 (2018) 8071–8077.
- [5] N. Zhang, X.T. Wang, Z. Xiong, L.Y. Huang, Y. Jin, A.J. Wang, P.X. Yuan, Y.B. He, J.J. Feng, Hydrogen bond organic frameworks as a novel electrochemiluminescence luminophore: simple synthesis and ultrasensitive biosensing, *Anal. Chem.* 93 (2021) 17110–17118.
- [6] L. Zhou, N. Gan, F. Hu, T. Li, Y. Cao, D. Wu, Microchip electrophoresis array-based aptasensor for multiplex antibiotic detection using functionalized magnetic beads and polymerase chain reaction amplification, *Sens. Actuators B Chem.* 263 (2018) 568–574.
- [7] R. Zeng, L. Zhang, L. Su, Z. Luo, Q. Zhou, D. Tang, Photoelectrochemical bioanalysis of antibiotics on rGO-Bi<sub>2</sub>WO<sub>6</sub>-Au based on branched hybridization chain reaction, *Biosens. Bioelectron.* 133 (2019) 100–106.
- [8] L. Tian, Y. Zhang, L. Wang, Q. Geng, D. Liu, L. Duan, Y. Wang, J. Cui, Ratiometric dual signal-enhancing-based electrochemical biosensor for ultrasensitive kanamycin detection, *ACS Appl. Mater. Interfaces*. 12 (2020) 52713–52720.
- [9] Y. Chen, L. Zhao, X. Wu, Y. Dong, G.L. Wang, Spontaneously formation of

peroxidase mimetics on CuWO<sub>4</sub> for homogeneous and universal aptasensing platform, *Sens. Actuators B Chem.* 367 (2022) 132040.

[10] G.H. Li, W. Pang, Y.L. Bian, S. Liu, S. Li, Z.X. Gao, W.J. Kang, A surface-enhanced Raman scattering and colorimetric dual-mode aptasensor for ultrasensitive detection of kanamycin based on DNA hydrogel network fishing the MIL-101@AuNP nanohybrids, *Sensor. Actuat. B Chem.*, 414 (2024) 135937

[11] L. Zheng, Q. Li, X.K. Deng, Q.F. Guo, D.D. Liu, G.M. Nie, A novel electrochemiluminescence biosensor based on Ru(bpy)<sub>3</sub><sup>2+</sup>-functionalized MOF composites and cycle amplification technology of DNAzyme walker for ultrasensitive detection of kanamycin, *J. Colloid Interface Sci.*, 659 (2024) 859–867

[12] X. Yao, L.Y. Yang, S.Y. Yang, J.H. Shen, D.Q. Huo, H.B. Fa, C.J. Hou, M. Yang, A sensitive sandwich-type electrochemical aptasensing platform based on Ti<sub>3</sub>C<sub>2</sub>Tx/MoS<sub>2</sub>/MWCNT@rGONR composites for simultaneous detection of kanamycin and chloramphenicol in food samples, *Anal. Methods*, 2024, DOI: 10.1039/D4AY00545G.

[13] P. Song, P. Qu, M. Wang, A.J. Wang, Y.D. Xue, L.P. Mei, J.J. Feng, Self-checking dual-modal aptasensor based on hybrid Z-scheme heterostructure of Zn-defective CdS/ZnS for oxytetracycline detection, *Anal. Chim. Acta* 1274 (2023) 341542.
